# Supplementary material for: Free-standing nitrogen-doped graphene paper for lithium storage application
Source: Royal Society of Chemistry journal article supplement (doi:10.1039/c8ra01019f), 2018-01-01
Supplement: c8ra01019f1.pdf [file c8ra01019f1.pdf]

## Supporting Information

### Free-standing Nitrogen-doped Graphene Paper for Lithium Storage Application

**Hao Wen<sup>†</sup>, Binbin Guo, Wenbin Kang, Chuhong Zhang<sup>★</sup>**

State Key Laboratory of Polymer Materials Engineering, Polymer Research Institute,  
Sichuan University, No. 24, South Section 1, Yihuan Road, Chengdu 610065, China.

<sup>★</sup>To whom correspondence should be addressed.

E-mail: [chuhong.zhang@scu.edu.cn](mailto:chuhong.zhang@scu.edu.cn)

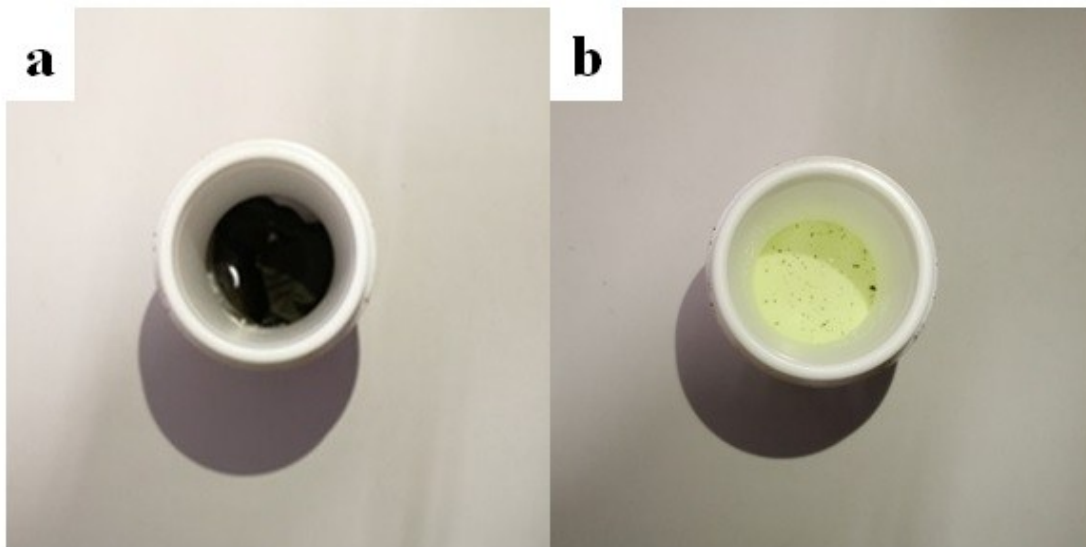

**Figure S1.** Photographs of GOP samples a) before and b) after the conventional hydrothermal reaction process;

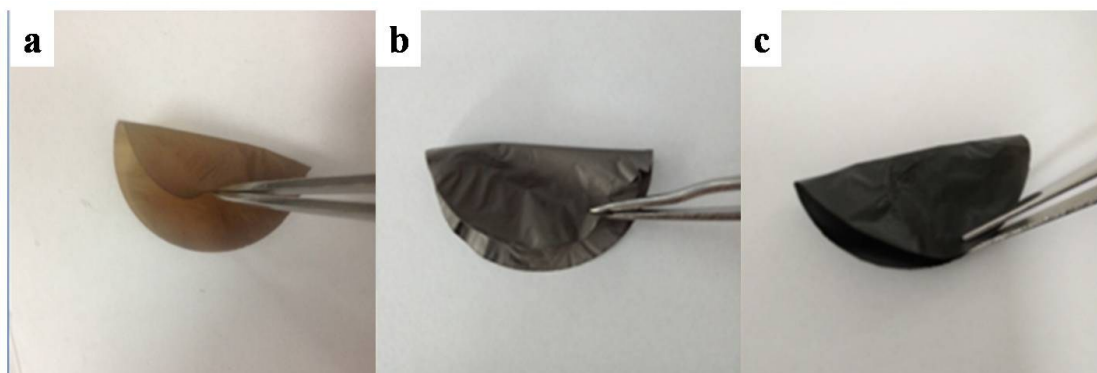

**Figure S2.** Photographs of flexible a) GOP, b) GP and c) N-GP;

**Table S1**

Values of the equivalent circuit components used to fit the experimental Ac Impedance data after 5 cycles

| Component       | N-GP  | GP    |
|-----------------|-------|-------|
| $R_e/\Omega$    | 1.908 | 10.01 |
| $R_s/\Omega$    | 31.69 | 42.12 |
| $R_{ct}/\Omega$ | 21.37 | 58.43 |
